# Supplementary material for: Roles of oceanic ventilation and terrestrial outflow in the atmospheric non-methane hydrocarbons over the Chinese marginal seas
Source: Copernicus journal article supplement (doi:10.5194/egusphere-2023-2935), 2024-03-06
Supplement: Supplementary file 1 [file egusphere-2023-2935-supplement.pdf]

**Roles of oceanic ventilation and terrestrial outflow in the atmospheric non-methane hydrocarbons over the Chinese marginal seas**

**Jian Wang<sup>1</sup>, Lei Xue<sup>2</sup>, Qian Yao Ma<sup>1</sup>, Feng Xu<sup>1</sup>, Gaobin Xu<sup>1</sup>, Shibo Yan<sup>1</sup>, Jiawei Zhang<sup>3</sup>,**

**Jianlong Li<sup>1</sup>, Honghai Zhang<sup>1,\*</sup>, Guiling Zhang<sup>1</sup>, Zhaohui Chen<sup>4</sup>**

<sup>1</sup>Frontiers Science Center for Deep Ocean Multispheres and Earth System, Key Laboratory of Marine Chemistry Theory and Technology, Ministry of Education, and College of Chemistry and Chemical Engineering, Ocean University of China, Qingdao 266100, China

<sup>2</sup>Department of Chemistry, College of Environmental Science and Forestry, State University of New York, Syracuse, NY, 13210, United States

<sup>3</sup>Eco-Environmental Monitoring and Research Center, Pearl River Valley and South China Sea Ecology and Environment Administration, Ministry of Ecology and Environment, Guangzhou 510610, China

<sup>4</sup>Key Laboratory of Physical Oceanography, Ministry of Education, Ocean University of China, Qingdao 266100, China

\* To whom correspondence should be addressed: [honghaizhang@ouc.edu.cn](mailto:honghaizhang@ouc.edu.cn)

**Contents of this file:**

Table S1 to S11

Figure S1 to S2

**Table S1** Precision and detection limit of the analytical method for different gases

| Species   | Precision<br>(%) | Detection limit<br>(ppt) | Species                         | Precision<br>(%) | Detection limit<br>(ppt) |
|-----------|------------------|--------------------------|---------------------------------|------------------|--------------------------|
| Ethane    | 5                | 3.0                      | DMS                             | 5                | 3.0                      |
| Ethylene  | 4                | 1.0                      | Benzene                         | 5                | 20                       |
| Propane   | 7                | 3.0                      | Ethylbenzene                    | 4                | 14                       |
| Propylene | 7                | 0.5                      | Toluene                         | 3                | 15                       |
| i-butane  | 6                | 1.0                      | CFC-11                          | 1                | 5.0                      |
| n-butane  | 5                | 1.0                      | CHBr <sub>3</sub>               | 7                | 0.03                     |
| n-pentane | 6                | 2.0                      | CH <sub>2</sub> Br <sub>2</sub> | 6                | 0.04                     |
| i-pentane | 7                | 2.0                      | CH <sub>3</sub> I               | 2                | 0.1                      |
| Isoprene  | 4                | 1.0                      |                                 |                  |                          |

**Table S2** Parameters for inlet, oven, and detector of the gas chromatography

| Parameters                                | Setting                                                                                                                                                                           |
|-------------------------------------------|-----------------------------------------------------------------------------------------------------------------------------------------------------------------------------------|
| Inlet temperature                         | 150 °C                                                                                                                                                                            |
| Temperature program                       | 45 °C for 3.5 mins; increase to 120 °C with a rate of 10 °C min <sup>-1</sup> and hold for 15 mins; increase to 170 °C with a rate of 30 °C min <sup>-1</sup> and hold for 3 mins |
| Flow rate of carrier gas                  | N <sub>2</sub> : 2.0 mL min <sup>-1</sup>                                                                                                                                         |
| Split ratio                               | 5:1                                                                                                                                                                               |
| Detector temperature                      | 300 °C                                                                                                                                                                            |
| Flow rate of the combustion/auxiliary gas | H <sub>2</sub> : 30 mL min <sup>-1</sup> ; air: 400 mL min <sup>-1</sup>                                                                                                          |
| Flow rate of exhaust gas purge            | N <sub>2</sub> : 60 mL min <sup>-1</sup>                                                                                                                                          |

**Table S3** Precision and detection limit of the analytical method for seawater non-methane hydrocarbons (NMHCs)

| NMHCs     | Precision (%) | Detection limit (pmol L <sup>-1</sup> ) |
|-----------|---------------|-----------------------------------------|
| Ethane    | 6             | 1.0                                     |
| Ethylene  | 4             | 0.7                                     |
| Propane   | 4             | 0.7                                     |
| Propylene | 3             | 0.5                                     |
| i-butane  | 6             | 0.5                                     |
| n-butane  | 5             | 0.8                                     |
| Isoprene  | 3             | 0.5                                     |

**Table S4** Information for urban air samples collection and concentrations of atmospheric non-methane hydrocarbons (NMHCs)

| City     | Latitude<br>(N) | Longitude<br>(E) | Date      | Time<br>(UTC+8) | Ethane | Propane | i-butane | n-butane | Ethylene | Propylene | Isoprene |
|----------|-----------------|------------------|-----------|-----------------|--------|---------|----------|----------|----------|-----------|----------|
| Tianjin  | 38.96           | 117.71           | 2021/3/27 | 09:00           | 5.39   | 20.08   | 27.57    | 30.24    | 0.283    | 0.065     | 0.025    |
| Tianjin  | 38.96           | 117.71           | 2021/3/27 | 23:00           | 5.72   | 7.70    | 2.31     | 6.56     | 0.186    | 0.121     | 0.015    |
| Dongying | 37.40           | 118.89           | 2021/3/28 | 09:00           | 3.48   | 2.36    | 0.43     | 1.05     | 0.390    | 0.029     | 0.007    |
| Dongying | 37.40           | 118.89           | 2021/3/28 | 23:00           | 3.47   | 2.40    | 0.43     | 1.04     | 0.389    | 0.033     | 0.008    |
| Qingdao  | 36.09           | 120.34           | 2021/3/28 | 09:00           | 1.63   | 0.63    | 0.03     | 0.11     | 0.101    | 0.007     | 0.006    |
| Qingdao  | 36.09           | 120.34           | 2021/3/28 | 23:00           | 1.41   | 0.44    | BD       | 0.02     | 0.035    | BD        | 0.007    |
| Ningbo   | 29.99           | 122.23           | 2021/3/28 | 09:00           | 2.65   | 1.98    | 0.69     | 0.79     | 0.200    | 0.019     | 0.009    |
| Ningbo   | 29.99           | 122.23           | 2021/3/28 | 23:00           | 2.62   | 3.06    | 3.20     | 3.84     | 0.390    | 0.130     | 0.023    |
| Xiamen   | 24.45           | 118.08           | 2021/3/27 | 09:00           | 1.31   | 0.25    | 0.03     | 0.02     | 0.050    | BD        | 0.025    |
| Shenzhen | 22.53           | 114.05           | 2021/3/28 | 09:00           | 1.62   | 1.52    | 0.86     | 1.85     | 0.102    | 0.016     | 0.177    |
| Shenzhen | 22.53           | 114.05           | 2021/3/28 | 23:00           | 0.83   | 0.15    | 0.01     | 0.08     | 0.092    | 0.018     | 0.008    |
| Qinzhou  | 21.87           | 108.61           | 2021/3/29 | 09:00           | 0.95   | 0.15    | 0.13     | 0.05     | 0.101    | 0.006     | 0.076    |
| Sanya    | 18.39           | 109.02           | 2021/4/1  | 09:00           | 0.28   | 0.22    | 0.08     | 0.15     | 0.077    | 0.023     | 0.014    |
| Sanya    | 18.39           | 109.02           | 2021/4/1  | 23:00           | 0.34   | 0.43    | 0.23     | 0.32     | 0.122    | 0.040     | 0.250    |

BD: below the detection limit

**Table S5** Information for oceanic air samples collection and concentrations of non-methane hydrocarbons (NMHCs) in oceanic atmosphere

| Station | Latitude<br>(N) | Longitude<br>(E) | Date      | Time<br>(UTC+8) | Ethane | Propane | i-butane | n-butane<br>(ppb) | Ethylene | Propylene | Isoprene |
|---------|-----------------|------------------|-----------|-----------------|--------|---------|----------|-------------------|----------|-----------|----------|
| E1      | 31.35           | 122.6            | 2021/4/26 | 20:09           | 0.969  | 0.236   | 0.018    | 0.025             | 0.083    | 0.023     | 0.0051   |
| E2      | 31.3            | 126.49           | 2021/4/27 | 20:33           | 0.815  | 0.195   | BD       | 0.036             | 0.11     | 0.038     | 0.0163   |
| E3      | 30.04           | 122.71           | 2021/4/29 | 18:09           | 1.723  | 1.571   | 0.403    | 0.511             | 0.199    | 0.034     | 0.0056   |
| E4      | 29.32           | 122.38           | 2021/4/29 | 23:33           | 1.471  | 1.215   | 0.384    | 0.424             | 0.143    | 0.03      | 0.0039   |
| E5      | 28.78           | 123.09           | 2021/4/30 | 5:32            | 1.114  | 0.587   | 0.092    | 0.108             | 0.101    | 0.025     | 0.0129   |
| E6      | 29.27           | 125.43           | 2021/4/28 | 7:40            | 0.686  | 0.226   | BD       | 0.035             | 0.05     | 0.049     | 0.0177   |
| E7      | 27.88           | 121.33           | 2021/5/1  | 18:26           | 1.67   | 1.787   | 0.806    | 0.694             | 0.295    | 0.036     | 0.0016   |
| E8      | 27.46           | 124.97           | 2021/4/30 | 19:10           | 1.076  | 0.443   | 0.078    | 0.086             | 0.142    | 0.038     | 0.0055   |
| E9      | 26.57           | 120.96           | 2021/5/2  | 5:19            | 1.505  | 1.297   | 0.289    | 0.461             | 0.133    | 0.03      | 0.0432   |
| E10     | 26.03           | 121.75           | 2021/5/2  | 12:17           | 0.99   | 0.437   | 0.063    | 0.082             | 0.076    | 0.022     | 0.003    |
| H1      | 39.51           | 123.9            | 2021/4/20 | 15:12           | 1.23   | 0.439   | 0.54     | 0.082             | 0.13     | 0.031     | 0.0036   |
| H2      | 38.75           | 122.99           | 2021/4/20 | 11:20           | 0.702  | 1.7     | BD       | 0.447             | 0.028    | 0.034     | 0.0133   |
| H3      | 37.99           | 122.04           | 2021/4/19 | 17:20           | 1.58   | 1.197   | 1.168    | 0.596             | 0.253    | 0.029     | 0.0061   |
| H4      | 37.95           | 123.91           | 2021/4/21 | 6:05            | 1.448  | 0.318   | 0.194    | 0.045             | 0.075    | 0.023     | BD       |
| H5      | 35.03           | 123.03           | 2021/4/24 | 12:15           | 1.255  | 0.654   | 0.229    | 0.222             | 0.244    | 0.06      | 0.0022   |
| H6      | 33.95           | 121.85           | 2021/4/25 | 9:39            | 1.007  | 0.361   | 0.189    | 0.091             | 0.129    | 0.03      | 0.0016   |
| H7      | 34.02           | 123.79           | 2021/4/25 | 1:22            | 1.276  | 0.816   | 0.233    | 0.259             | 0.286    | 0.037     | 0.0134   |
| H8      | 32.99           | 122.98           | 2021/4/27 | 9:16            | 1.355  | 0.804   | 0.139    | 0.203             | 0.123    | 0.023     | 0.0007   |
| H9      | 32.43           | 123.84           | 2021/4/26 | 8:06            | 1.072  | 0.332   | 0.05     | 0.056             | 0.152    | 0.034     | 0.0035   |

BD: below the detection limit

**Table S6** Atmospheric non-methane hydrocarbons (NMHCs) from different reports

| Region                                | Ethane | Propane | i-butane | n-butane | Ethylene | Propylene | Isoprene | Reference         |
|---------------------------------------|--------|---------|----------|----------|----------|-----------|----------|-------------------|
| (ppb)                                 |        |         |          |          |          |           |          |                   |
| The Yellow Sea and the East China Sea | 1.24   | 0.822   | 0.283    | 0.256    | 0.151    | 0.033     | 0.008    | This study        |
| Bengal Bay                            | 0.561  | 0.191   | 0.107    | 0.143    | 0.299    | 0.192     | ND       | Sahu et al., 2011 |
| Bengal Bay                            | 0.861  | 0.093   | 0.040    | 0.156    | 0.099    | 0.059     | ND       | Sahu et al., 2011 |
| Northwest Pacific Ocean               | 0.61   | 0.24    | 0.12     | 0.07     | 0.42     | 0.60      | ND       | Li et al., 2019   |

ND: No data.

Table S7 Information for seawater samples and concentrations of non-methane hydrocarbons (NMHCs)

| Station                 | Latitude<br>(N) | Longitude<br>(E) | Date      | Time<br>(UTC+8) | Ethane | Propane | i-butane | n-butane | Ethylene | Propylene | Isoprene |
|-------------------------|-----------------|------------------|-----------|-----------------|--------|---------|----------|----------|----------|-----------|----------|
| (pmol L <sup>-1</sup> ) |                 |                  |           |                 |        |         |          |          |          |           |          |
| E1                      | 31.35           | 122.6            | 2021/4/26 | 20:32           | 9.11   | 6.69    | 9.81     | BD       | 80.8     | 26.2      | 31.9     |
| E2                      | 31.3            | 126.49           | 2021/4/27 | 20:57           | 11.7   | 11.5    | 2.79     | BD       | 109      | 13.4      | 22.5     |
| E3                      | 30.04           | 122.71           | 2021/4/29 | 18:22           | 22.8   | 32.3    | 6.17     | 10.38    | 136      | 27.6      | 105      |
| E4                      | 29.32           | 122.38           | 2021/4/29 | 23:50           | 11     | 15.7    | 14.4     | BD       | 66.2     | 14.4      | 59.7     |
| E5                      | 28.78           | 123.09           | 2021/4/30 | 5:55            | 7.83   | 3.76    | 1.54     | BD       | 8.4      | 2.42      | 3.43     |
| E7                      | 27.88           | 121.33           | 2021/5/1  | 18:40           | 14.4   | 18.9    | 20.4     | BD       | 69.6     | 20.8      | 44.9     |
| E8                      | 27.46           | 124.97           | 2021/4/30 | 19:42           | 10.5   | 6.9     | 4.33     | BD       | 89.9     | 8.29      | 17.3     |
| E9                      | 26.57           | 120.96           | 2021/5/2  | 5:44            | 15.6   | 14.5    | 18       | 1.44     | 62.5     | 18        | 51.3     |
| E10                     | 26.03           | 121.75           | 2021/5/2  | 12:42           | 4.7    | 3.68    | 2.76     | BD       | 17.9     | 6.43      | 7.6      |
| H2                      | 38.75           | 122.99           | 2021/4/20 | 11:41           | 13.3   | 22      | 2.92     | 32.92    | 79       | 27        | 10       |
| H3                      | 37.99           | 122.04           | 2021/4/19 | 17:41           | 13.6   | 17.1    | 3.41     | 18.85    | 59.4     | 16.7      | 26.3     |
| H4                      | 37.95           | 123.91           | 2021/4/21 | 6:31            | 13     | 10.1    | 35.3     | 0.56     | 115      | 19.8      | 17.9     |
| H5                      | 35.03           | 123.03           | 2021/4/24 | 12:36           | 11.3   | 10.9    | 4.86     | 15.03    | 87.9     | 11.4      | 36.1     |
| H6                      | 33.95           | 121.85           | 2021/4/25 | 9:58            | 8.4    | 10.7    | 9.52     | BD       | 35.8     | 8.43      | 19.4     |
| H7                      | 34.02           | 123.79           | 2021/4/25 | 1:47            | 7.96   | 7.94    | 5.91     | BD       | 54.8     | 6.37      | 20.5     |
| H9                      | 32.43           | 123.84           | 2021/4/26 | 8:41            | 10.1   | 9.4     | 9.22     | BD       | 55.2     | 15.5      | 22.1     |

BD: below the detection limit

**Table S8** Surface seawater temperature (SST), wind speed(u), and sea-to-air flux of non-methane hydrocarbons (NMHCs) for oceanic stations

| Station | SST<br>(°C) | u<br>(m s <sup>-1</sup> ) | Ethane | Propane | i-butane | n-butane<br>(nmol m <sup>-2</sup> d <sup>-1</sup> ) | Ethylene | Propylene | Isoprene |
|---------|-------------|---------------------------|--------|---------|----------|-----------------------------------------------------|----------|-----------|----------|
| E1      | 17          | 11.6                      | 73.9   | 50.5    | 71.4     | -0.6                                                | 737.1    | 211.9     | 227.3    |
| E2      | 19.6        | 7.8                       | 47     | 43.2    | 9.8      | -0.3                                                | 489.3    | 52.7      | 78.5     |
| E3      | 19.3        | 8.9                       | 118.3  | 157.4   | 27.8     | 46.8                                                | 774.7    | 138.9     | 468.2    |
| E4      | 18.4        | 10.6                      | 76.8   | 104.4   | 90.4     | -0.5                                                | 517.1    | 99.2      | 365.6    |
| E5      | 19.5        | 12.7                      | 81.5   | 35.6    | 14.2     | -0.8                                                | 89.8     | 23.3      | 31       |
| E7      | 20.7        | 5.5                       | 29.6   | 36.7    | 37.1     | -0.1                                                | 158.2    | 42        | 79.9     |
| E8      | 22          | 9.9                       | 70.8   | 43.4    | 26       | -0.5                                                | 681.6    | 54.7      | 102.2    |
| E9      | 20.4        | 4.2                       | 18.3   | 15.9    | 18.7     | 1.4                                                 | 80.8     | 20.7      | 52       |
| E10     | 25          | 6.1                       | 12.3   | 9.1     | 6.7      | -0.2                                                | 53.4     | 17.2      | 18.2     |
| H2      | 12.4        | 4.3                       | 13.1   | 20.5    | 2.5      | 28.7                                                | 86.1     | 26.1      | 8.5      |
| H3      | 14.6        | 1.7                       | 2.3    | 2.7     | 0.5      | 2.8                                                 | 11       | 2.7       | 3.8      |
| H4      | 9.2         | 9.8                       | 60.8   | 44.1    | 146      | 2                                                   | 594.6    | 90.7      | 72.3     |
| H5      | 13.3        | 11.5                      | 81.8   | 73.5    | 31       | 96.1                                                | 706      | 80.5      | 226.3    |
| H6      | 13.6        | 4.6                       | 9.8    | 11.9    | 10       | -0.1                                                | 46.5     | 9.7       | 20       |
| H7      | 14.4        | 0.7                       | 0.2    | 0.2     | 0.1      | ND                                                  | 1.7      | 0.2       | 0.5      |
| H9      | 15.5        | 5.5                       | 17.9   | 15.7    | 14.7     | -0.1                                                | 109.4    | 27.2      | 34.4     |

**Table S9** Distance from station to nearest land (L), transport time of air mass from it leaving the land to the station (t), and retention of air mass over the land (R<sub>L</sub>)

| Station | L<br>(km) | t<br>(hour) | R <sub>L</sub> -48 | R <sub>L</sub> -72 | R <sub>L</sub> -96 | R <sub>L</sub> -mean |
|---------|-----------|-------------|--------------------|--------------------|--------------------|----------------------|
| E1      | 68.34     | 19          | 0.19               | 0.39               | 0.51               | 0.36                 |
| E2      | 330.99    | 44          | 0.07               | 0.07               | 0.16               | 0.58                 |
| E3      | 29.19     | 11          | 0.79               | 0.86               | 0.89               | 0.10                 |
| E4      | 40.28     | 20          | 0.75               | 0.82               | 0.86               | 0.85                 |
| E5      | 113.85    | 14          | 0.61               | 0.72               | 0.78               | 0.81                 |
| E6      | 298.68    | 15          | 0.29               | 0.27               | 0.23               | 0.70                 |
| E7      | 13.86     | 12          | 0.78               | 0.84               | 0.88               | 0.26                 |
| E8      | 319.87    | 38          | 0.52               | 0.64               | 0.72               | 0.83                 |
| E9      | 69.24     | 49          | 0.14               | 0.11               | 0.16               | 0.62                 |
| E10     | 83.10     | 46          | 0.56               | 0.56               | 0.63               | 0.14                 |
| H1      | 34.64     | 20          | 0.29               | 0.47               | 0.53               | 0.58                 |
| H2      | 33.43     | 22          | 0.35               | 0.53               | 0.63               | 0.43                 |
| H3      | 48.09     | 4           | 0.94               | 0.96               | 0.97               | 0.50                 |
| H4      | 61.65     | 81          | 0                  | 0                  | 0.09               | 0.96                 |
| H5      | 199.84    | 26          | 0.25               | 0.27               | 0.4                | 0.03                 |
| H6      | 124.22    | 30          | 0.17               | 0.14               | 0.27               | 0.31                 |
| H7      | 119.51    | 33          | 0.11               | 0.1                | 0.13               | 0.19                 |
| H8      | 158.65    | 42          | 0.06               | 0.26               | 0.4                | 0.11                 |
| H9      | 197.59    | 39          | 0.23               | 0.43               | 0.54               | 0.24                 |

**Table S10** Sea-to-air fluxes of non-methane hydrocarbons (NMHCs) in different studies

| Region                        | Ethane                                  | Propane   | i-butane  | n-butane  | Ethylene  | Propylene | Isoprene  | Reference              |
|-------------------------------|-----------------------------------------|-----------|-----------|-----------|-----------|-----------|-----------|------------------------|
|                               | (mmol m <sup>-2</sup> d <sup>-1</sup> ) |           |           |           |           |           |           |                        |
| Yellow Sea and East China Sea | 44.6                                    | 41.5      | 31.7      | 10.9      | 321       | 56.1      | 112       | This study             |
| Yellow Sea and East China Sea | 31.7±27.8                               | 29.7±25.1 | 18.5±16.4 | 15.9±19.1 | 240±258   | 67.9±74.5 | 52.4±82.3 | Wu et al., 2021        |
| East China Sea                | 12.5±14.4                               | 17.9±40.9 | 4.1±5.3   | 8.5±10.3  | 65.0±73.4 | 22.4±26.8 | 54.2±67.0 | Li et al., 2021        |
| Marginal seas of China        | -                                       | -         | -         | -         | 529       | 383       | 111       | Li et al., 2021        |
| North Sea                     | 20.4                                    | 17.2      | 4.31      | -         | 145       | 57.4      | 24.4      | Broadgate et al., 1997 |
| 23-38°N Atlantic Ocean        | 28.7                                    | 21.5      | 2.87      | 5.74      | 315       | 103       | -         | Tran et al., 2013      |
| Western Pacific Ocean         | 6.6                                     | 12.4      | -         | -         | 74.7      | 24.1      | 43.4      | Li et al., 2019        |
| Northwest Pacific Ocean       | 28.0                                    | 21.1      | 12.7      | 14.2      | 65.2      | 48.7      | 41.7      | Wu et al., 2023        |

"-" indicates no data.

**Table S11** Parameters and results of ozone formation potential (OFP) calculation for non-methane hydrocarbons (NMHCs)

| Species   | Mean conc. of NMHCs (ppb) | MIR (gO <sub>3</sub> gVOC <sup>-1</sup> ) | M (g mol L <sup>-1</sup> ) | OFP (µg m <sup>-3</sup> ) |                   |                 |                                  |
|-----------|---------------------------|-------------------------------------------|----------------------------|---------------------------|-------------------|-----------------|----------------------------------|
|           |                           |                                           |                            | Industrial activities     | Exhaust emissions | Ocean emissions | Terrestrial vegetation emissions |
| Ethane    | 1.21                      | 0.28                                      | 30.07                      | 0.173                     | 0.164             | 0.083           | 0.017                            |
| Propane   | 0.769                     | 0.49                                      | 44.1                       | 0.507                     | 0.103             | 0.046           | 0.039                            |
| i-butane  | 0.288                     | 1.23                                      | 58.12                      | 0.520                     | 0.044             | 0.006           | 0.029                            |
| n-butane  | 0.234                     | 1.15                                      | 58.12                      | 0.600                     | 0.039             | 0               | 0.041                            |
| Ethylene  | 0.145                     | 9.00                                      | 28.05                      | 0.472                     | 0.465             | 0.450           | 0                                |
| Propylene | 0.033                     | 1.66                                      | 42.08                      | 0.050                     | 0.031             | 0.028           | 0.019                            |
| Isoprene  | 0.008                     | 10.61                                     | 68.12                      | 0.012                     | 0.022             | 0.024           | 0.125                            |

316  
317  
318  
319  
320  
321  
322  
323  
324  
325  
326

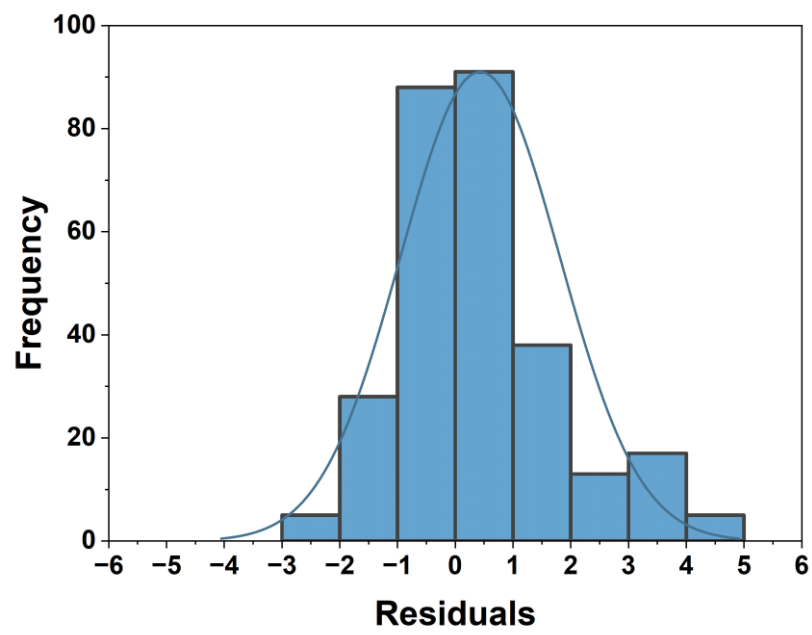

**Figure S1** The scaled residuals given by positive matrix factorization (PMF)

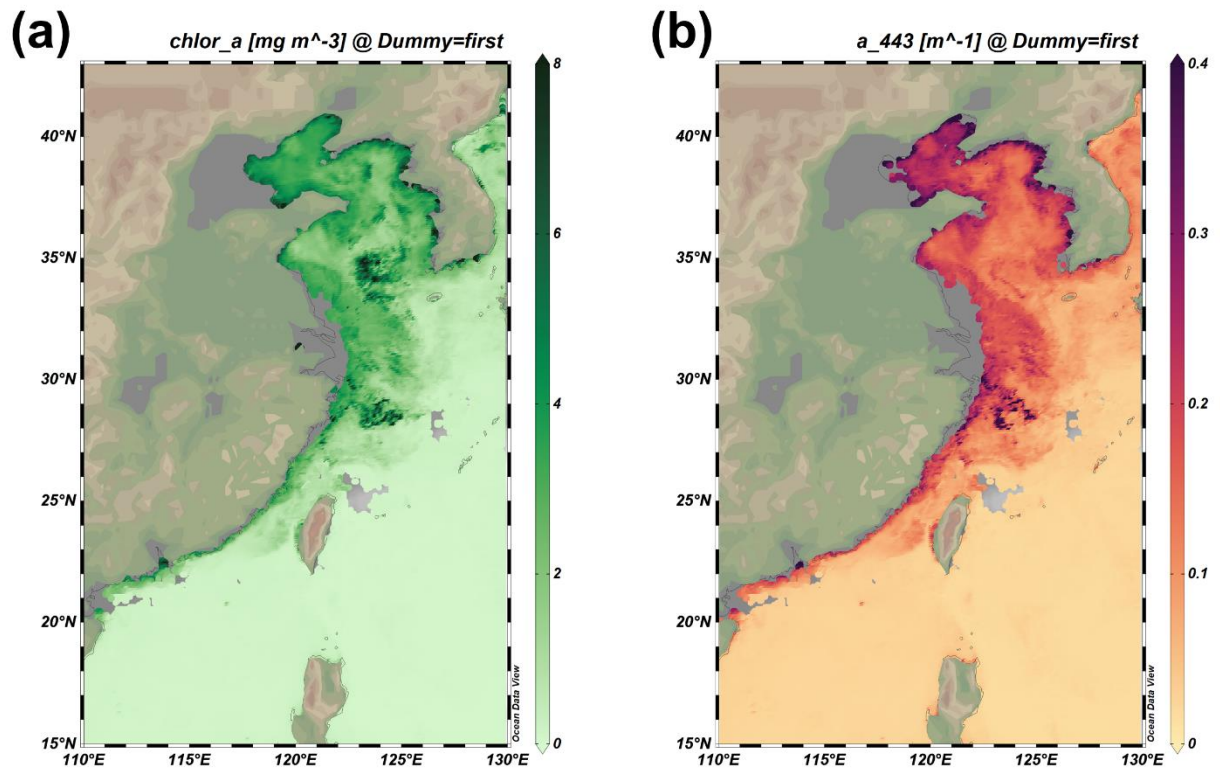

**Figure S2** Romte sensing monthly Chl-*a* concentration (panel a) and total absorption coefficient at 443 nm (panel b) in April 2021. Data of Aqua-MODIS at resolution of 9 km were downloaded from <https://oceancolor.gsfc.nasa.gov/>.
