# Supplementary material for: Roles of oceanic ventilation and terrestrial outflow in the atmospheric non-methane hydrocarbons over the Chinese marginal seas
Source: Copernicus journal article supplement (doi:10.5194/egusphere-2023-2935), 2024-03-06
Supplement: Supplementary file [file egusphere-2023-2935-AC1-supplement.pdf]

1 **An itemized response (blue words) to the reviewer's comments and**  
2 **suggestions**

3 We sincerely appreciate the reviewers for the comments concerning our manuscript  
4 entitled "Roles of oceanic ventilation and terrestrial outflow in the atmospheric non-  
5 methane hydrocarbons over the Chinese marginal seas" [EGUSPHERE-2023-2935].

6 These comments are all valuable and very helpful for improving our paper and have an  
7 important guiding significance to our future research. We have made changes to the  
8 manuscript and tried our best to improve the manuscript following these comments.

9 The changed portion in the revised manuscript is highlighted in blue. The primary  
10 corrections in the revised manuscript and the detailed responses to the comments of the  
11 reviewer are as follows.

12 **Reviewer #1 Evaluations:**

13 The manuscript is mainly describing the specific effects of ocean emission and  
14 terrestrial input on the atmospheric NMHCs in a representative marginal sea. While the  
15 impact of terrestrial input on the coastal environment is widely recognized, a more  
16 detailed discussion has been lacking. The authors address the influence mechanism of  
17 terrestrial land-based inputs on nearshore atmospheric NMHCs, taking into the distance  
18 from the shore and relevant parameters of air masses, and assess the relative  
19 contributions from land and ocean sources. This is meaningful to deepen the

20 understanding of how terrestrial input affecting the marine environment near the coast.

21 I think the manuscript is suitable for publication in the ACP after a revision.

22 **Reply:** We sincerely appreciate the reviewer's valuable comments and suggestions,  
23 which help us improve the manuscript. Following the reviewer's comments, we made  
24 a revision to the manuscript. All changes in the revised manuscript are highlighted in  
25 blue. We also provide below a point-to-point list regarding the changes made in the text  
26 for the reviewer's convenience to review.

27 Major comments or suggestions:

28 1. The positive matrix factorization model is the methodology employed by the authors  
29 to deconvolute the source factors of atmospheric NMHCs and assess their respective  
30 contributions. The authors should provide a more detailed exposition on the principles  
31 of this approach in Method section to enhance clarity and understanding.

32 **Reply:** Thanks for your valuable suggestion. Details for the PMF model have been  
33 supplied in the manuscript, as indicated below:

34 Line 221-245:

35 "PMF model introduced in detail in the study of Paatero and Trapper (1994) was  
36 applied to analyze the data of atmospheric NMHCs in the Yellow Sea and the East China  
37 Sea. Based on a matrix consisting of the concentrations of diverse chemical species, the  
38 objective of PMF is to determine the number of NMHCs source factors, the chemical  
39 composition profile of each factor, and the contribution of each factor to species. The

40 matrix representation of this model is as follows:

$$41 \quad x_{ij} = \sum_{k=1}^p g_{ik} f_{kj} + e_{ij} \quad (9)$$

42 Where  $x_{ij}$  represents the concentration of species  $j$  measured on sample  $i$ ,  $p$  denotes  
43 the number of factors facilitating the samples.  $f_{kj}$  represents the concentration of  
44 species  $j$  in factor profile  $k$ ,  $g_{ik}$  denotes the relative contribution of factor  $k$  to sample  
45  $i$ , and  $e_{ij}$  represents the PMF model error of species  $j$  measured on sample  $i$ . The  
46 factors resolved by PMF are typically interpreted as sources. The objective of this  
47 algorithm is to find the values of  $f_{kj}$ ,  $g_{ik}$ , and  $p$  that best reproduce  $x_{ij}$ , continuously  
48 adjusting  $f_{kj}$  and  $g_{ik}$  until the minimum  $Q$  value for a given  $p$  is attained.  $Q$  is  
49 defined as:

$$50 \quad Q = \sum_{i=1}^n \sum_{j=1}^m \left( \frac{e_{ij}}{\sigma_{ij}} \right)^2 \quad (10)$$

51 Where  $\sigma_{ij}$  represents the uncertainty of the concentration of the species  $j$  in sample  $i$ ,  
52  $n$  is the number of samples, and  $m$  is the number of species. In applying the PMF  
53 model, the significance of missing data in the matrix was decreased by using the species  
54 median. The uncertainty for normal data was estimated as 20 % of the NMHCs  
55 concentrations because the analytical uncertainty was not available (Buzcu and Fraser,  
56 2006). The model ran 20 times and we selected the result with the minimum  $Q$  value.  
57 Besides, approximately 94 % of the scaled residuals given by PMF ranged from -3 to 3  
58 (Fig. S1), suggesting a reasonable fit of the model result."

59

60

61

62 2. While the authors have made a clear statement regarding the significant difference in  
63 NMHCs between urban and marine atmosphere, there is still a need for a more explicit  
64 expression on the distribution characteristics of NMHCs, especially in the marine  
65 atmosphere. It is advisable to make advancements in the description within the main  
66 text, ideally supplemented with relevant Figure for a comprehensive view.

67 **Reply:** Thanks for your valuable suggestion. We have represented an explicit  
68 description about the distribution of NMHCs in the marine atmosphere in the main text  
69 and provided relevant Figures in supporting information, as indicated below:

70 Line 271-277:

71 “In spatial terms, multiple NMHCs (e.g. ethane, propane, i-butane, n-butane, and  
72 ethylene) showed higher atmospheric concentrations in regions closer to the land. The  
73 elevated concentrations are primarily concentrated along the coastal regions of the East  
74 China Sea and the north Yellow Sea (Figure S3). The disparity in NMHCs  
75 concentrations between land and ocean, as well as the distribution pattern of NMHCs  
76 in the marine atmosphere, suggested the potential influence of terrestrial sources on the  
77 oceanic NMHCs.”

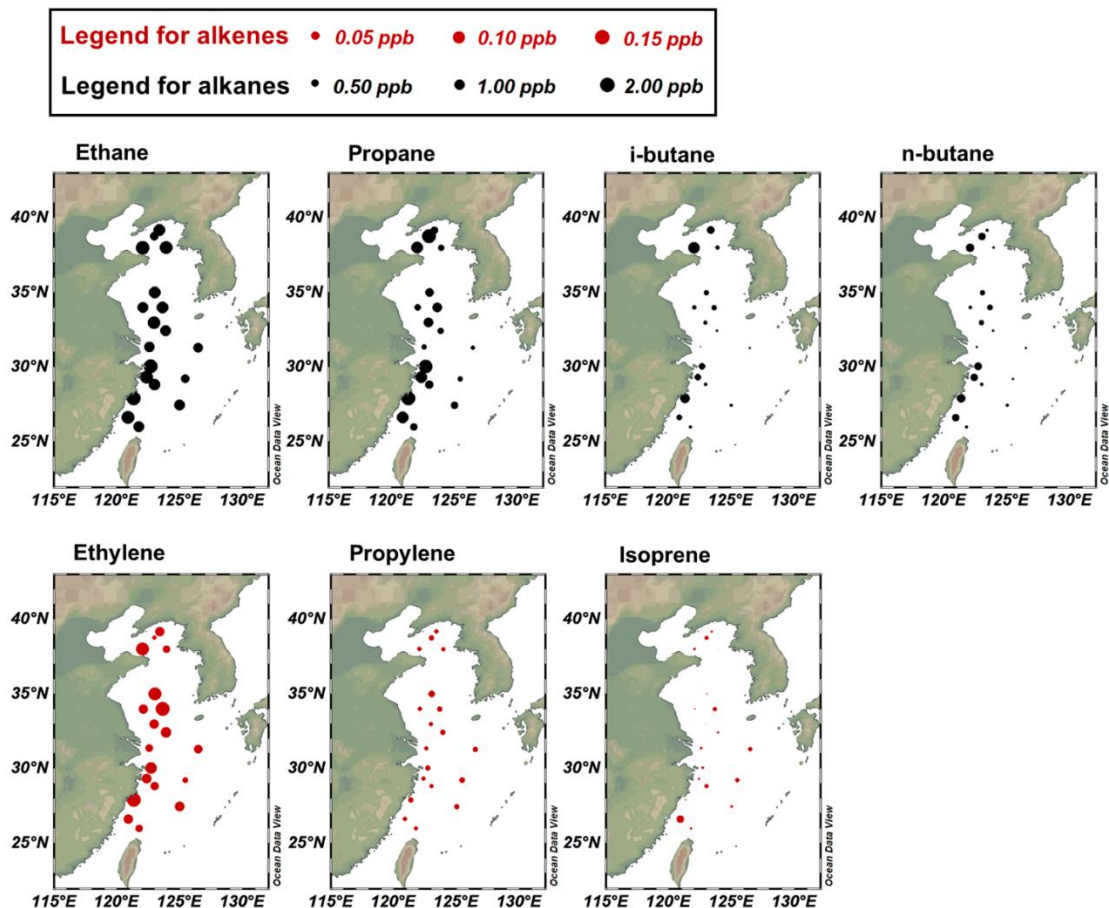

78

79 **Figure S3** Distributions of alkanes (black dots) and alkenes (red dots) in the atmosphere over the  
 80 **Yellow Sea and the East China Sea**

81 3. Obviously, the distance from the land to the oceanic station is a crucial parameter in  
 82 the authors' discussion. However, I didn't find any information about the source of  
 83 distance data or an introduction to the relevant calculation method. The authors should  
 84 explicitly provide details on these aspects for clarity and transparency in the manuscript.

85 **Reply:** We are sorry for our negligence about the introduction of the calculation method  
 86 for the distance from the land to the oceanic stations. It has been supplied in the  
 87 manuscript, as indicated below:

88 **Line 196-202:**

89 **“2.7 Calculation of the shortest distance from the sampling station to the land**

90 Coastline latitude and longitude data near the study area (20-45°N, 110-130°E) were  
91 extracted from the World Vector Shorelines (downloaded from  
92 <https://www.ngdc.noaa.gov/mgg/shorelines/data/gshhg/latest/>). Subsequently,  
93 distances from the maritime sampling stations to all coastal locations were computed.  
94 The minimum value among these distances was selected as the shortest distance to the  
95 land (listed in Table S9).”

96 4. The authors have employed an innovative approach in assessing the impact of sea-  
97 air flux on the marine NMHCs, by calculating the atmospheric lifetime-weighted  
98 concentrations of different gases. In this way, the variabilities of atmospheric  
99 reactivities of different gases were considered simultaneously when examining the  
100 relationship between flux and concentration. It is found intriguing and seemed effective.  
101 Furthermore, the authors could extend this novel idea to the discussion about the air  
102 mass. Both of land retention and transport time of air masses serve as indicators of air  
103 mass characteristics, reflecting the impact of land-based inputs. Combining these two  
104 parameters to collectively explore the impact of air masses on NMHCs might offer a  
105 new perspective, potentially leading to fresh discoveries

106 **Reply:** Thanks for your valuable suggestion. As combining the effects of  $R_L$  and  
107 transport time of air mass on marine NMHCs, it emphasized the possibility of the  
108 terrestrial influence on the marine atmospheric environment.

109 Line 343-347:

110 “Notably, elevated alkane concentrations were affected by those air masses with larger  
111  $R_{L-mean}$  ( $>0.8$ ) and shorter transport time ( $<20$  h) (Figure S4). This emphasized the  
112 terrestrial influence on alkanes in the marine atmosphere, since both  $R_L$  and transport  
113 time serve as indicators of air mass terrestrial characteristics.”

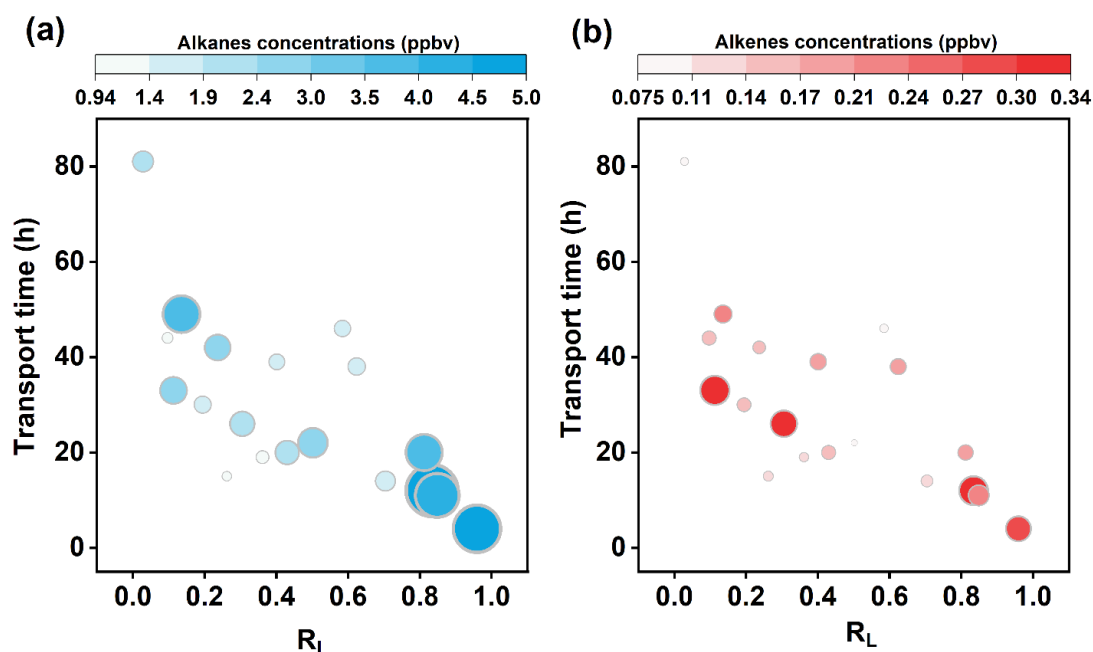

114  
115 **Figure S4** Impacts of air mass (indicated by transport time and  $R_L$ ) on atmospheric alkanes (a) and  
116 alkenes (b) over the Yellow Sea and the East China Sea

117  
118 **Minor comments:**

119 1. Show the standard deviation when you mentioned average, like line 266 “the mean  
120 (range) concentration of ethane, propane, i-butane, and n-butane was 2.26 (0.277-5.72),  
121 2.95 (0.149-20.1), 2.57 (BD-27.6), and.....”

122 **Reply:** Thanks for your valuable suggestion. It has been revised in the manuscript, as  
123 indicated below:

124 Line 251-254:

125 “In urban atmosphere (n = 14), the mean (range) concentration of ethane, propane, i-  
126 butane, and n-butane was  $2.26 \pm 1.66$  (0.277-5.72),  $2.95 \pm 5.12$  (0.149-20.1),  $2.57 \pm$   
127  $6.99$  (BD-27.6), and  $3.29 \pm 7.68$  (0.018-30.2) ppb, respectively (Table 1).”

128 Line 257-260:

129 “For alkene species in the urban atmosphere (n = 14), the mean (range) of ethylene,  
130 propylene, and isoprene was  $0.180 \pm 0.126$  (0.035-0.390),  $0.036 \pm 0.040$  (BD-0.129),  
131 and  $0.046 \pm 0.072$  (0.006-0.250) ppb, respectively.”

132 Line 262-266:

133 “In the marine atmosphere (n = 19), the mean (range) concentration of ethane, propane,  
134 i-butane, n-butane, ethylene, propylene, and isoprene was  $1.24 \pm 0.298$  (0.686-1.72),  
135  $0.822 \pm 0.518$  (0.226-1.79),  $0.283 \pm 0.302$  (BD-1.17),  $0.256 \pm 0.214$  (0.025-0.694),  
136  $0.151 \pm 0.077$  (0.028-0.295),  $0.033 \pm 0.009$  (0.022-0.060), and  $0.008 \pm 0.010$  (BD-  
137 0.043) ppb, respectively.”

138 Line 366-370:

139 “The mean (range) of sea-to-air fluxes of ethane, propane, i-butane, n-butane, ethylene,  
140 propylene, and isoprene was  $44.6 \pm 35.0$  (0.2-118),  $41.5 \pm 39.9$  (0.2-157),  $31.7 \pm 38.2$   
141  $(0.1-146)$ ,  $10.9 \pm 25.4$  (-0.8-96.1),  $321 \pm 294$  (1.7-775),  $56.1 \pm 55.2$  (0.2-212), and  $112$   
142  $\pm 134$  (0.5-468)  $\text{nmol m}^{-2} \text{d}^{-1}$ , respectively, in the Yellow Sea and the East China Sea  
143 (Table 1).”



144 2. line 358 “ethane possesses an atmospheric lifetime of approximately 78 d at 24 h  
145 [ $\bullet$ OH] concentration of  $6 \times 10^5$  molecules  $\text{cm}^{-3}$ .....”. References are needed to  
146 illustrate the source and credibility of the data used here.

147 **Reply:** Thanks for your valuable suggestion. We have cited the relevant references as  
148 indicated below:

149 “For instance, ethane possesses an atmospheric lifetime of approximately 78 d at 24 h  
150 [ $\bullet$ OH] concentration of  $6 \times 10^5$  molecules  $\text{cm}^{-3}$  (Jobson et al., 1999), using the rate  
151 constant with  $\bullet$ OH at 288 K taken from Atkinson et al. (1997).”

152 3 line 468 “ozone formation potential (OFP) of NMHCs was calculated using  $\text{OFP} =$   
153  $\text{MIR} \times \text{C} \dots$ ” The calculation description should be in the method section and clearly  
154 present the specific constants used in the equation and their literature sources.

155 **Reply:** Thanks for your valuable suggestion. The calculation description has been  
156 composed in the method section 2.5 and the specific constants have been presented in  
157 Table S11.

#### 158 **“5 Calculation of ozone formation potential of NMHCs**

$$159 \text{OFP}_i = \text{MIR}_i \times \text{C}_i \quad (5)$$

160 To assess the environmental implications of different sources, the ozone formation  
161 potential (OFP) of NMHCs was calculated using Eq. (5), where  $\text{MIR}_i$  depicts the  
162 maximum incremental reactivity and  $\text{C}_i$  represents the concentration of NMHCs  
163 (Carter, 1994). Specific data was listed in supplementary Table S11.”

164 4 Is it necessary to include both the full term and abbreviation ‘NMHCs’ in the caption  
 165 of each Figure? Generally, after the initial mention in the text, subsequent references  
 166 can use the abbreviation alone for conciseness.

167 **Reply:** Thanks for your valuable suggestion. After the first appearance of the full name,  
 168 we use abbreviations in the following text.

169 5 Increase the font size of the text in the Figures to make them more readable.

170 **Reply:** We feel sorry for the blurred figures due to the inappropriate font size. We have  
 171 increased the font size of the text in the Figures, e.g. Figure 7.

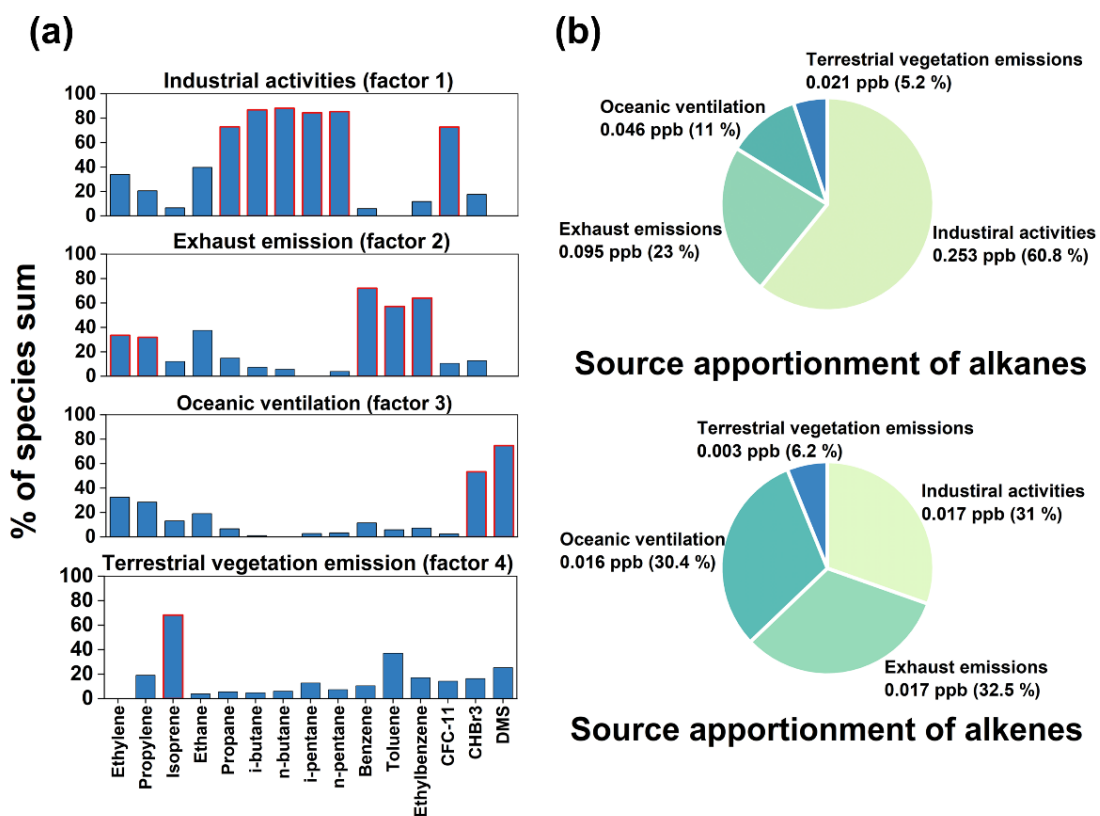

172  
 173 **Figure 7** Representative factor profiles from the PMF model (panel a) and relative contributions of  
 174 different factors/sources to the alkanes and alkenes in the oceanic atmosphere (panel b). NMHCs in

175 panel a marked with red rim are selected as indicators for the specific factors.
